# Supplementary material
Source: PubMed Central journal article supplement (PMC3427079)
Supplement: 1208075109_pnas.201208075SI.pdf [file 1208075109_pnas.201208075SI.pdf]

# Supporting Information

Lijek et al. 10.1073/pnas.1208075109

## SI Materials and Methods

**Bacterial Strains and Mutants.** A *Streptococcus pneumoniae* TIGR4 mutant lacking *sp\_1119* was constructed using overlap extension PCR. Primers koSP19-F3 (5'-GAC AAA AAT GAA GGA GTG ATT ACA TGA-3') and koSP19-R2 (5'-GTT TTA CAC GAT TAT TTC CTC CCG TTA AAT AAT AG-3') were used to amplify the erythromycin *erm* cassette from shuttle vector pMU1328 (1); nucleotides complementary to the *sp\_1119*-flanking regions were added at the beginning and end of the cassette. Primer pairs koSP19-F1 (5'-GCC ATT AAC AGT GCT AGT TTT G-3')/R1.2 (5'-CAC TGG TTC ATT TTT GTC CTC CTG AAA ATG-3') and koSP19-F4 (5'-AGG AAA TAA TCG TGT AAA ACC AGG AAA TTG-3')/R4.2 (5'-CCG AGA CGA GTT CCT TGC CCA-3') were used to amplify up- and downstream flanking regions of *sp\_1119* from TIGR4, deleting all of the gene and adding nucleotides complementary to the *erm* cassette. The three fragments were pieced together using the primers koSP19-F2 (5'-TTG GAT GTT GAA GAA GAT TTG G -3') and koSP19-R3.2 (5'-CCC TTA CGA ATA AAG GAA AGA ACA CT-3'). This PCR construct, with the *erm* cassette replacing the *sp\_1119* locus, was transformed into TIGR4 with selection for erythromycin resistance (1  $\mu$ g/mL), creating strain TIGR4*sp\_1119*. An unencapsulated TIGR4*sp\_1119* mutant was created by transforming TIGR4*cps* (2) with genomic DNA from TIGR4*sp\_1119* and selecting for erythromycin and kanamycin (200  $\mu$ g/mL) resistance. All mutants were back-transformed and confirmed by PCR.

*Staphylococcus aureus* strains used in this study include 8325-4, 8325-4*spa* (a mutant lacking protein A, provided by Tim Foster, Trinity College, Dublin), 502A, Newman, MW2, SH1000, USA300, Reynolds, Becker, and COL (provided by Barry Kreiswirth, University of Medicine and Dentistry of New Jersey, Newark, NJ). An unmarked, in-frame deletion mutant of *rocA*, which encodes P5CDH, was constructed in strain 502A using methods previously described by Bae and Schneewind (3) using pKOR1-*rocA*. The resulting strain, 502A*rocA*, was complemented with the single-copy integration plasmid pCL55 using methods previously described by Lee et al. (4). The coding sequence and presumptive native promoter of *rocA* were amplified from the 502A chromosome for cloning into pCL55 using primer pairs 1845*rocA*-F (TAC TTC CAA TCC AAT GGA TAA TGA CCT ACC ATC CGA AAC)/1846*rocA*-R (TTA TCC ACT TCC AAT GTA GAT GAG AAA CTC ATG AGC G). This construct then was used to create strain 502A*rocA*::pCL55-*rocA*<sup>+</sup> using the pCL55-specific protocol (4). Deletion and complementation were confirmed by PCR and Western blot.

**Mouse Model of Nasopharyngeal Colonization.** Six-to-eight-week-old female C57BL/6 and B6.129-S2-Igh-6tm1Cgn/J ( $\mu$ MT; Jackson Laboratories) mice were housed in accordance with University of Pennsylvania Institutional Animal Care and Use Committee protocols.  $\mu$ MT mice do not produce specific antibody because of a targeted mutation in the heavy-chain locus of IgM (5). The murine model of pneumococcal nasopharyngeal colonization has been described previously (6). Mice were inoculated intranasally (i.n.) without anesthesia with 10  $\mu$ L of PBS containing 10<sup>7</sup> cfu of PBS-washed, midlog-phase bacteria. Inocula were plated to confirm the dose. Where indicated, mice received a second inoculation at week 2 following the initial inoculation and were challenged at week 7, at which time no pneumococci remain in the nasopharynx (6). Control animals were subjected to the same protocol but were mock-colonized with 10  $\mu$ L of PBS.

Intranasal challenge of *S. aureus* 502A consisted of 10<sup>8</sup> cfu of PBS-washed, midlog-phase bacteria in 10  $\mu$ L PBS. Twenty-four hours after inoculation, animals were killed, sera were collected from cardiac punctures, and nasal lavages were obtained as previously described (6) for quantitative culture on BBL CHROMagar Staph aureus (BD Diagnostics). The lower limit of detection for bacteria in lavages was 10 cfu/mL. Where indicated, preimmune sera were collected by tail bleed before bacterial colonization.

**Western Blot Analysis.** Cell lysates of *S. aureus* were prepared by incubation with lysostaphin (0.1 mg/mL) (Sigma) for 20 min at 37 °C, followed by boiling at 100 °C for 10 min in Laemmli sample buffer. Equal loading was confirmed by measurement of total protein with the Micro BCA protein assay (Pierce Chemical Co.) and staining by Ponceau S (0.2%, Sigma). Proteins were separated by 1D SDS/PAGE on a 10% Tris-HCl gel (Bio-Rad) and then were transferred to a PVDF membrane (Thermo Scientific) by using the Trans-Blot SD semidry transfer system (Bio-Rad) at 18 V. For 2D SDS/PAGE, isoelectric focusing (pI 4.7–5.9) was carried first out in a Protean IEF cell (Bio-Rad), using 7-mm ReadyStrips, according to the manufacturer's instructions. Gels from 2D SDS/PAGE were partially transferred (18 V for 18 min, compared with 36 min for 1D SDS/PAGE), and after transfer the remaining gel was stained using Coomassie brilliant blue R-250 (Fisher Scientific) to obtain a stained gel and membrane pair. Membranes were blocked with either 1% BSA (Sigma) or 0.5% goat serum (Sigma) before incubation with primary antibody, either mouse sera (1:500 dilution) or rabbit antisera (1:30,000 dilution), as indicated. Bound antibody was detected by using anti-mouse or anti-rabbit secondary antibody conjugated to alkaline phosphatase (Sigma) and 5-bromo-4-chloro-3-indolylphosphate-nitroblue tetrazolium (Fisher) development.

**Mass Spectrometry.** Cross-reactive spots identified by Western blot analysis were excised from the corresponding Coomassie-stained gel for mass spectrometry. Following digestion with trypsin, sample peptides were separated using an HPLC<sub>C18</sub> column and a linear trap quadrupole ion-trap mass spectrometer (Thermo Scientific). Mascot software was used to search bacterial databases for sequence similarities. Cutoffs were assigned as a protein score of >70 with a unique peptide value of >2.

**Measurement of Serum Antibody Binding by Flow Cytometry.** Similar to previously described assays (7), 200  $\mu$ L of midlog-phase bacteria were pelleted and washed in Hanks buffer (Invitrogen) supplemented with 5% (vol/vol) FCS (HFCS; HyClone). For *S. aureus*, a protein A mutant, 8325-4*spa*, was used to prevent nonspecific antibody binding by protein A. Primary antibodies (diluted 1:20 for sera from *S. pneumoniae*-colonized mice or 1:200 for rabbit-specific antisera) were added to the reaction mixtures and incubated at 37 °C for 60 min with rotation. After washing in HFCS, the cells were incubated with FITC-conjugated secondary antibody against either mouse or rabbit IgG (Sigma) for 60 min at 4 °C in the dark at a dilution of 1:200. After washing, the cells were fixed in 200  $\mu$ L of 1% paraformaldehyde for flow cytometric analysis. A total of 50,000 bacterial cells per sample were analyzed on a BD FACS Calibur flow cytometer (BD Biosciences), and groups were compared using FlowJo software (Tree Star). The percentage of FITC-positive cells was calculated by subtracting background from a no-primary antibody control.



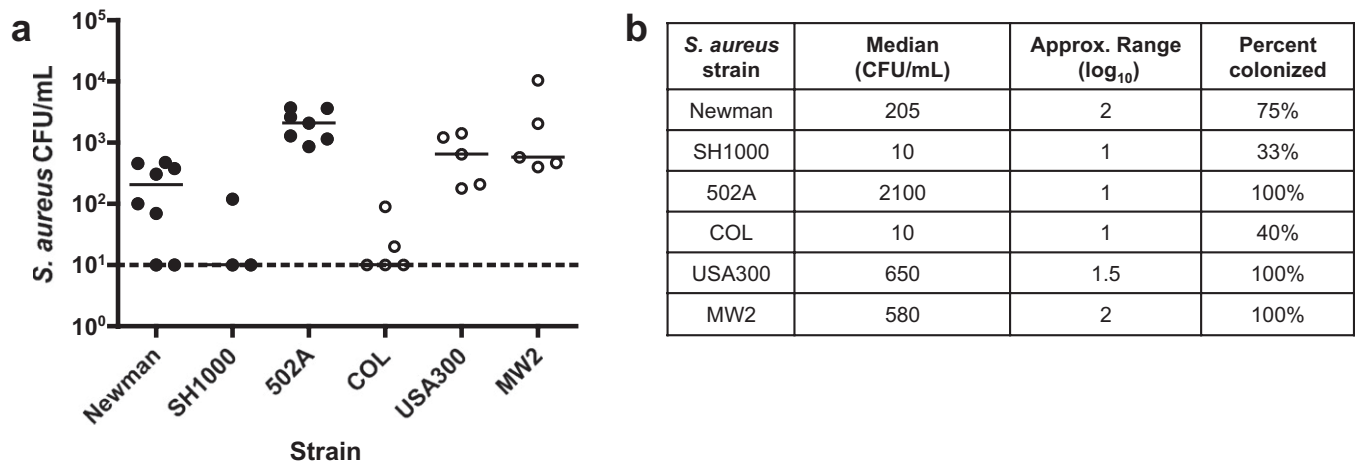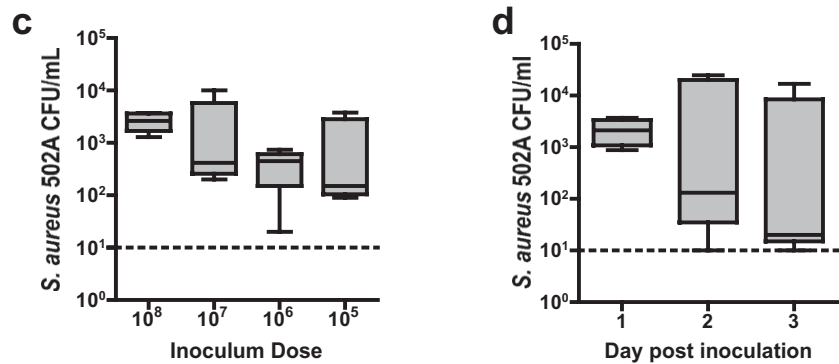

**Fig. S1.** Optimization of the *S. aureus* 502A colonization model in C57BL/6 mice. (A) Colonization density of the *S. aureus* strains indicated at day 1 after intranasal inoculation with  $10^8$  cfu in 10  $\mu$ L PBS. Closed circles represent methicillin-sensitive strains. Open circles represent methicillin-resistant strains. Solid horizontal lines indicate medians. The dotted horizontal line indicates the lower limit of detection. (B) Table of column statistics for each *S. aureus* strain shown in (A). (C) Optimization of inoculum dose (indicated in cfu) of *S. aureus* 502A nasal colonization in naive C57BL/6 mice assessed in lavages of the upper respiratory tract 1 d after inoculation. (D) Time course of *S. aureus* 502A nasal colonization after inoculation with  $10^8$  cfu. In C and D box and whiskers plots are for  $n \geq 5$  mice per condition, and the horizontal black dotted line indicates the limit of detection.

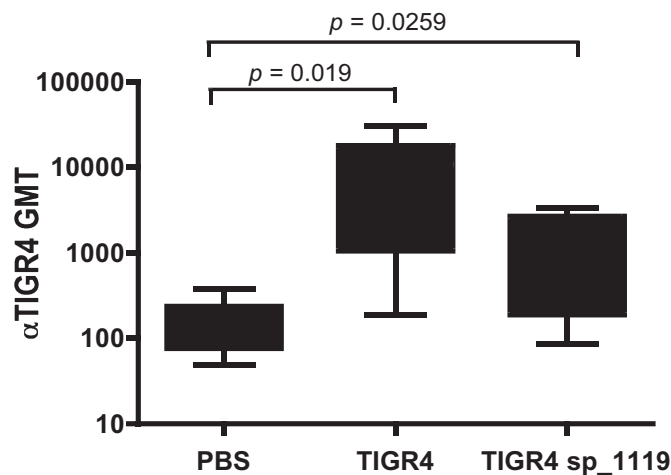

**Fig. S2.** Box and whiskers plot showing increased anti-pneumococcal antibody titers following colonization with TIGR4 and TIGR4sp<sub>1119</sub>. Detection of IgG titers (GMT) to whole-cell *S. pneumoniae* TIGR4 in mouse sera after colonization with *S. pneumoniae* TIGR4, *S. pneumoniae* TIGR4sp<sub>1119</sub>, or sham colonization (PBS), as indicated;  $n = 10$  mice per group.
